# Supplementary material for: Urinary Angiotensinogen and Progression of Chronic Kidney Disease: Results from KNOW-CKD Study
Source: MDPI journal article supplement (doi:10.3390/biom12091280), 2022-09-10
Supplement: s1 [file s1]

## **Supplemental Material**

### **Urinary Angiotensinogen and Progression of Chronic Kidney Disease: Results from KNOW-CKD Study**

Sang Heon Suh <sup>1</sup>, Tae Ryom Oh <sup>1</sup>, Hong Sang Choi <sup>1</sup>, Eun Mi Yangi <sup>2</sup>, Chang Seong Kim <sup>1</sup>,  
Eun Hui Bae <sup>1</sup>, Seong Kwon Ma <sup>1</sup>, Kook-Hwan Oh <sup>3</sup>, Ji Yong Jung <sup>4</sup>, Young Youl Hyun <sup>5</sup>  
and Soo Wan Kim <sup>1,\*</sup>

<sup>1</sup>Department of Internal Medicine, Chonnam National University Medical School and Chonnam National University Hospital, Gwangju 64169, Korea

<sup>2</sup>Department of Pediatrics, Chonnam National University Medical School and Chonnam National University Hospital, Gwangju 64169, Korea

<sup>3</sup>Department of Internal Medicine, Seoul National University Hospital, Seoul 03080, Korea

<sup>4</sup>Department of Internal Medicine, Gachon University of Medicine and Science, Incheon 21565, Korea

<sup>5</sup>Department of Internal Medicine, Kangbuk Samsung Hospital, Sungkyunkwan University School of Medicine, Seoul, 03181, Korea

**Running title:** UAGT and CKD progression

#### **Corresponding authors**

\*Soo Wan Kim, M.D., Ph.D., Department of Internal Medicine, Chonnam National University Medical School, 42 Jebongro, Gwangju 61469, Korea, Tel: +82-62-220-6271, Fax: +82-62-225-8578, Email: skimw@chonnam.ac.kr

## **Table of contents**

Figure S1. Kaplan-Meier survival curve for cumulative incidence of decline of kidney function by UAGT/Cr.

Figure S2. Kaplan-Meier survival curve for cumulative incidence of onset of ESRD by UAGT/Cr.

Figure S3. Restricted cubic spline of UAGT/Cr on decline of kidney function.

Figure S4. Restricted cubic spline of UAGT/Cr on onset of ESRD.

Table S1. HRs for decline of kidney function by UAGT/Cr level.

Table S2. HRs for onset of ESRD by UAGT/Cr level.

Table S3. HRs for composite renal event by UAGT/Cr level after excluding the subjects at CKD stage 1.

Table S4. HRs for composite renal event by UAGT/Cr level after excluding the subjects at CKD stage 5.

Table S5. HRs for composite renal event by UAGT/Cr level after excluding the subjects with DM.

Table S6. HRs for composite renal event by UAGT/Cr level after excluding the subjects with PKD.

Table S7. HRs for composite renal event by UAGT/Cr level in the quartile division.

Table S8. HRs for composite renal event by UAGT/Cr level, where the co-variate 'serum creatinine level' was replaced with 'eGFR'.

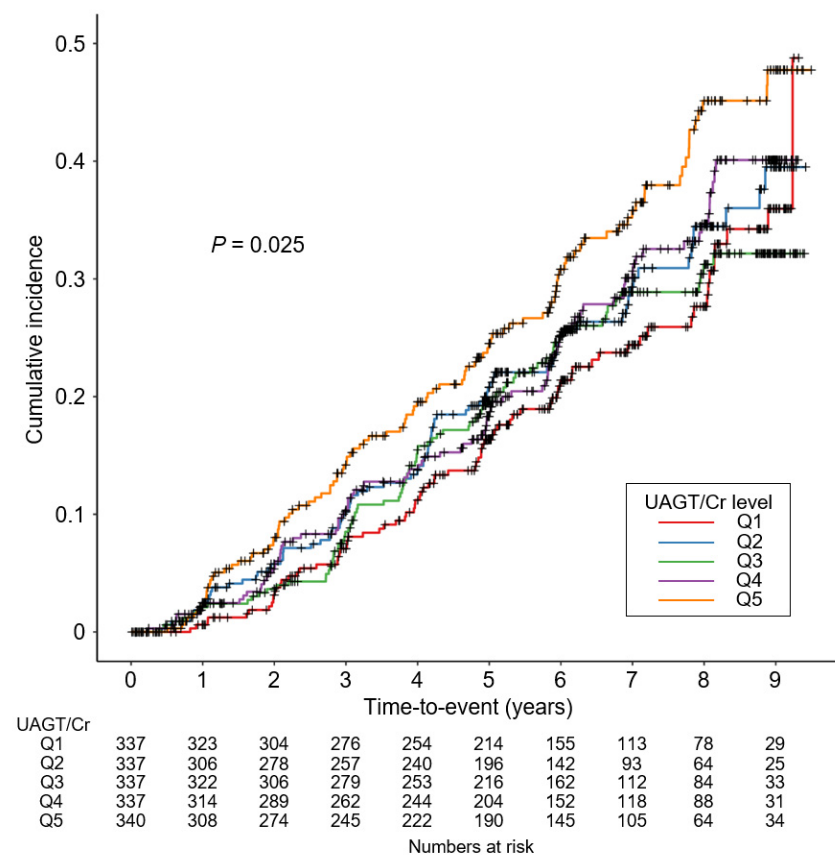

**Figure S1. Kaplan-Meier survival curve for cumulative incidence of decline of kidney function by UAGT/Cr.**

Note:  $P$  value by Log-rank test. Abbreviations: Q1, 1<sup>st</sup> quintile; Q2, 2<sup>nd</sup> quintile, Q3, 3<sup>rd</sup> quintile; Q4, 4<sup>th</sup> quintile; Q5, 5<sup>th</sup> quintile; UAGT/Cr, urinary angiotensinogen-to-creatinine ratio.

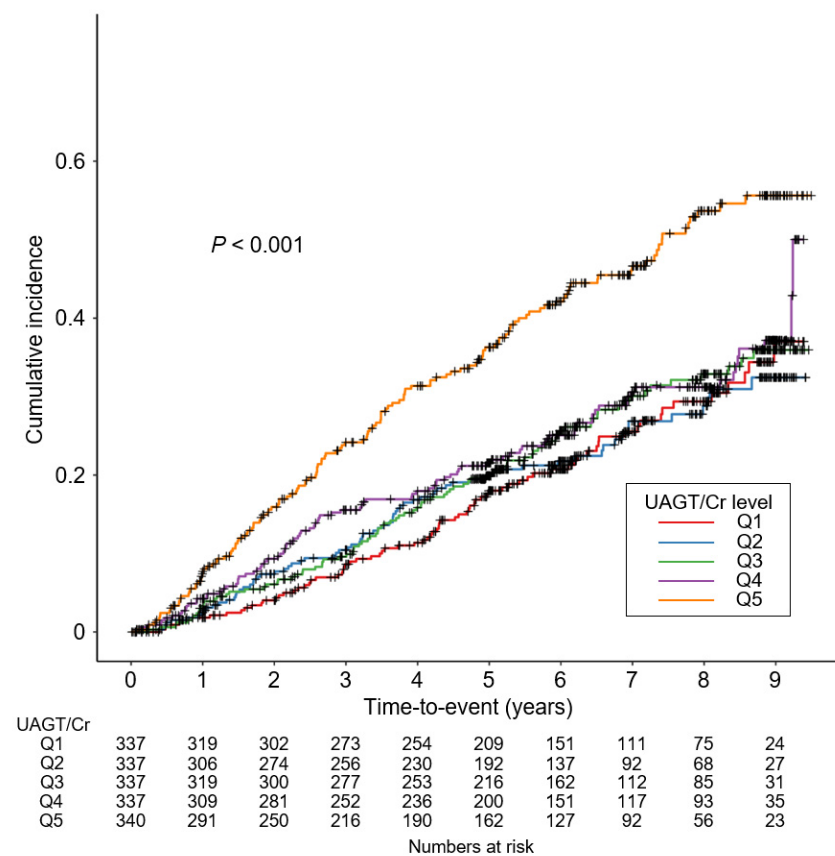

**Figure S2. Kaplan-Meier survival curve for cumulative incidence of onset of ESRD by UAGT/Cr.**

Note:  $P$  value by Log-rank test. Abbreviations: Q1, 1<sup>st</sup> quintile; Q2, 2<sup>nd</sup> quintile, Q3, 3<sup>rd</sup> quintile; Q4, 4<sup>th</sup> quintile; Q5, 5<sup>th</sup> quintile; UAGT/Cr, urinary angiotensinogen-to-creatinine ratio.

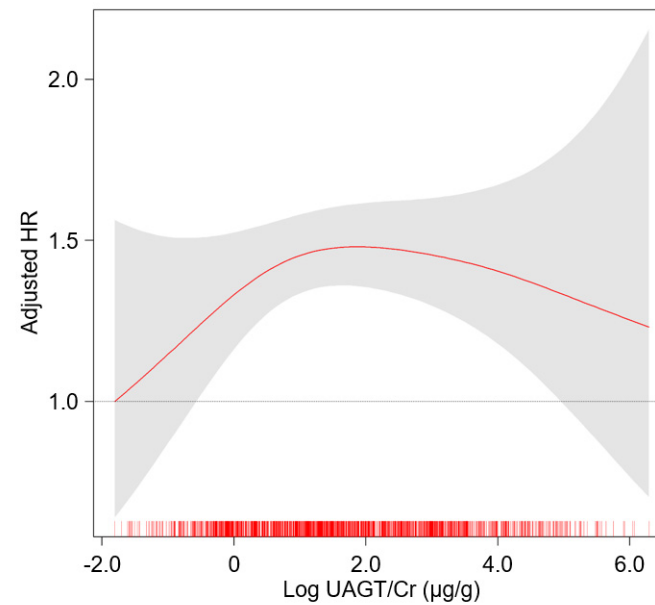

**Figure S3. Restricted cubic spline of UAGT/Cr on decline of kidney function.**

Note: Adjusted HR of UAGT/Cr as a continuous variable for composite renal event is depicted. The model was adjusted for age, sex, age-adjusted Charlson comorbidity index, primary renal disease, current smoking, medications (ACEi/ARBs, diuretics, number of antihypertensive drugs, statins), BMI, SBP, DBP, hemoglobin, albumin, fasting glucose, total cholesterol, LDL-C, HDL-C, TG, 25(OH) vitamin D, hs-CRP, serum creatinine and spot urine ACR.

Abbreviations: HR, hazard ratio; UAGT/Cr, urinary angiotensinogen-to-creatinine ratio.

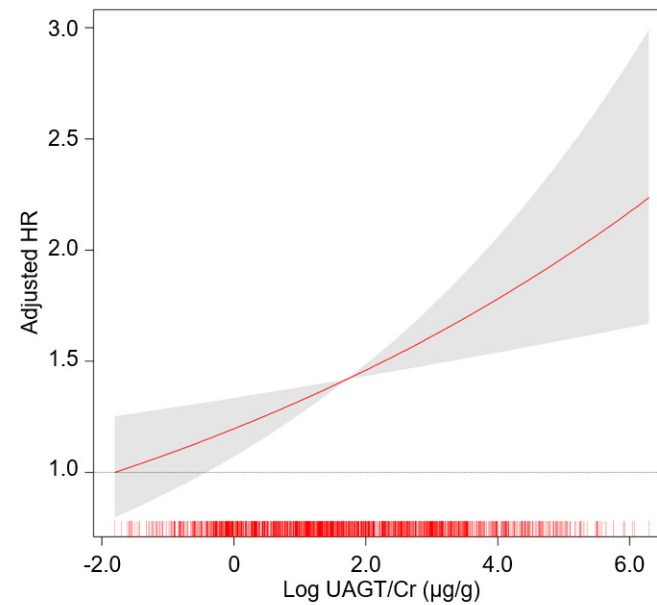

**Figure S4. Restricted cubic spline of UAGT/Cr on onset of ESRD.**

Note: Adjusted HR of UAGT/Cr as a continuous variable for composite renal event is depicted. The model was adjusted for age, sex, age-adjusted Charlson comorbidity index, primary renal disease, current smoking, medications (ACEi/ARBs, diuretics, number of antihypertensive drugs, statins), BMI, SBP, DBP, hemoglobin, albumin, fasting glucose, total cholesterol, LDL-C, HDL-C, TG, 25(OH) vitamin D, hs-CRP, serum creatinine and spot urine ACR.

Abbreviations: HR, hazard ratio; UAGT/Cr, urinary angiotensinogen-to-creatinine ratio.

**Table S1. HRs for decline of kidney function by UAGT/Cr level.**

|                            | UAGT/Cr | Events, n (%) | Model 1                 |                | Model 2                 |                | Model 3                 |                | Model 4                 |                |
|----------------------------|---------|---------------|-------------------------|----------------|-------------------------|----------------|-------------------------|----------------|-------------------------|----------------|
|                            |         |               | HR<br>(95%CI)           | <i>P</i> value |
| Decline of kidney function | Q1      | 77 (22.8)     | Reference               |                | Reference               |                | Reference               |                | Reference               |                |
|                            | Q2      | 84 (24.9)     | 1.177<br>(0.844, 1.641) | 0.338          | 1.384<br>(1.013, 1.891) | 0.414          | 1.391<br>(0.991, 1.954) | 0.056          | 1.402<br>(0.997, 1.972) | 0.052          |
|                            | Q3      | 84 (24.9)     | 1.060<br>(0.764, 1.473) | 0.726          | 1.278<br>(0.931, 1.753) | 0.129          | 1.309<br>(0.935, 1.832) | 0.117          | 1.317<br>(0.939, 1.848) | 0.111          |
|                            | Q4      | 91 (27.0)     | 1.345<br>(0.978, 1.848) | 0.068          | 1.245<br>(0.913, 1.699) | 0.166          | 1.313<br>(0.943, 1.827) | 0.106          | 1.284<br>(0.918, 1.795) | 0.144          |
|                            | Q5      | 108 (31.8)    | 1.632<br>(1.195, 2.228) | 0.002          | 1.375<br>(1.019, 1.856) | 0.037          | 1.309<br>(0.945, 1.814) | 0.105          | 1.204<br>(0.858, 1.691) | 0.283          |

Note: Model 1, unadjusted model. Model 2, model 1 + adjusted for age, sex, age-adjusted Charlson comorbidity index, primary renal disease, current smoking, medication (ACEi/ARBs, diuretics, number of antihypertensive drugs, statins), BMI, SBP and DBP. Model 3, model 2 + adjusted for hemoglobin, albumin, total cholesterol, LDL-C, HDL-C, TG, fasting glucose, 25(OH) vitamin D, and, hs-CRP. Model 4, model 3 + serum creatinine and spot urine ACR. Abbreviations: CI, confidence interval; HR, hazard ratio; Q1, 1<sup>st</sup> quintile; Q2, 2<sup>nd</sup> quintile, Q3, 3<sup>rd</sup> quintile; Q4, 4<sup>th</sup> quintile; Q5, 5<sup>th</sup> quintile; UAGT/Cr, urinary angiotensinogen-to-creatinine ratio.

**Table S2. HRs for onset of ESRD by UAGT/Cr level.**

|               | UAGT/Cr | Events, n (%) | Model 1                 |                | Model 2                 |                | Model 3                 |                | Model 4                 |                |
|---------------|---------|---------------|-------------------------|----------------|-------------------------|----------------|-------------------------|----------------|-------------------------|----------------|
|               |         |               | HR<br>(95%CI)           | <i>P</i> value |
| Onset of ESRD | Q1      | 77 (22.8)     | Reference               |                | Reference               |                | Reference               |                | Reference               |                |
|               | Q2      | 74 (22.0)     | 1.003<br>(0.712, 1.413) | 0.987          | 1.208<br>(0.875, 1.668) | 0.250          | 1.256<br>(0.887, 1.780) | 0.199          | 0.831<br>(0.565, 1.224) | 0.349          |
|               | Q3      | 91 (27.0)     | 1.152<br>(0.837, 1.587) | 0.385          | 1.574<br>(1.153, 2.148) | 0.004          | 1.562<br>(1.120, 2.178) | 0.009          | 1.470<br>(1.054, 2.049) | 0.023          |
|               | Q4      | 94 (27.9)     | 1.368<br>(0.995, 1.866) | 0.053          | 1.480<br>(1.008, 2.013) | 0.013          | 1.568<br>(1.133, 2.171) | 0.007          | 1.336<br>(0.963, 1.852) | 0.083          |
|               | Q5      | 142 (41.8)    | 2.282<br>(1.700, 3.063) | < 0.001        | 2.006<br>(1.508, 2.668) | < 0.001        | 1.901<br>(1.390, 2.600) | < 0.001        | 1.444<br>(1.050, 1.987) | 0.024          |

Note: Model 1, unadjusted model. Model 2, model 1 + adjusted for age, sex, age-adjusted Charlson comorbidity index, primary renal disease, current smoking, medication (ACEi/ARBs, diuretics, number of antihypertensive drugs, statins), BMI, SBP and DBP. Model 3, model 2 + adjusted for hemoglobin, albumin, total cholesterol, LDL-C, HDL-C, TG, fasting glucose, 25(OH) vitamin D, and, hs-CRP. Model 4, model 3 + serum creatinine and spot urine ACR. Abbreviations: CI, confidence interval; ESRD, end-stage renal disease; HR, hazard ratio; Q1, 1<sup>st</sup> quintile; Q2, 2<sup>nd</sup> quintile, Q3, 3<sup>rd</sup> quintile; Q4, 4<sup>th</sup> quintile; Q5, 5<sup>th</sup> quintile; UAGT/Cr, urinary angiotensinogen-to-creatinine ratio.



**Table S3. HRs for composite renal event by UAGT/Cr level after excluding the subjects at CKD stage 1.**

|                       | UAGT/Cr | Events, n (%) | Model 1                 |                | Model 2                 |                | Model 3                 |                | Model 4                 |                |
|-----------------------|---------|---------------|-------------------------|----------------|-------------------------|----------------|-------------------------|----------------|-------------------------|----------------|
|                       |         |               | HR<br>(95%CI)           | <i>P</i> value |
| Composite renal event | Q1      | 101 (36.1)    | Reference               |                | Reference               |                | Reference               |                | Reference               |                |
|                       | Q2      | 107 (39.5)    | 1.277<br>(0.952, 1.712) | 0.103          | 1.444<br>(1.070, 1.948) | 0.016          | 1.465<br>(1.112, 1.929) | 0.007          | 1.152<br>(0.837, 1.586) | 0.385          |
|                       | Q3      | 111 (42.4)    | 1.256<br>(0.944, 1.673) | 0.118          | 1.440<br>(1.071, 1.936) | 0.016          | 1.453<br>(1.010, 1.918) | 0.008          | 1.403<br>(1.043, 1.888) | 0.025          |
|                       | Q4      | 120 (44.3)    | 1.495<br>(1.132, 1.975) | 0.005          | 1.508<br>(1.127, 2.016) | 0.006          | 1.487<br>(1.132, 1.952) | 0.004          | 1.289<br>(0.961, 1.730) | 0.090          |
|                       | Q5      | 175 (56.8)    | 2.225<br>(1.713, 2.892) | < 0.001        | 1.804<br>(1.361, 2.390) | < 0.001        | 1.966<br>(1.526, 2.533) | < 0.001        | 1.449<br>(1.087, 1.932) | 0.012          |

Note: Model 1, unadjusted model. Model 2, model 1 + adjusted for age, sex, age-adjusted Charlson comorbidity index, primary renal disease, current smoking, medication (ACEi/ARBs, diuretics, number of antihypertensive drugs, statins), BMI, SBP and DBP. Model 3, model 2 + adjusted for hemoglobin, albumin, total cholesterol, LDL-C, HDL-C, TG, fasting glucose, 25(OH) vitamin D, and, hs-CRP. Model 4, model 3 + serum creatinine and spot urine ACR. Abbreviations: CI, confidence interval; HR, hazard ratio; Q1, 1<sup>st</sup> quintile; Q2, 2<sup>nd</sup> quintile, Q3, 3<sup>rd</sup> quintile; Q4, 4<sup>th</sup> quintile; Q5, 5<sup>th</sup> quintile; UAGT/Cr, urinary angiotensinogen-to-creatinine ratio.

**Table S4. HRs for composite renal event by UAGT/Cr level after excluding the subjects at CKD stage 5.**

|                       | UAGT/Cr | Events, n (%) | Model 1                 |                | Model 2                 |                | Model 3                 |                | Model 4                 |                |
|-----------------------|---------|---------------|-------------------------|----------------|-------------------------|----------------|-------------------------|----------------|-------------------------|----------------|
|                       |         |               | HR<br>(95%CI)           | <i>P</i> value |
| Composite renal event | Q1      | 96 (29.4)     | Reference               |                | Reference               |                | Reference               |                | Reference               |                |
|                       | Q2      | 102 (31.5)    | 1.204<br>(0.891, 1.627) | 0.226          | 1.440<br>(1.086, 1.910) | 0.011          | 1.564<br>(1.150, 2.128) | 0.004          | 1.397<br>(1.204, 1.907) | 0.035          |
|                       | Q3      | 100 (30.9)    | 1.063<br>(0.781, 1.419) | 0.734          | 1.346<br>(1.009, 1.795) | 0.042          | 1.450<br>(1.064, 1.975) | 0.019          | 1.241<br>(0.906, 1.698) | 0.179          |
|                       | Q4      | 110 (34.9)    | 1.389<br>(1.041, 1.855) | 0.026          | 1.458<br>(1.101, 1.931) | 0.009          | 1.653<br>(1.223, 2.233) | 0.001          | 1.288<br>(0.944, 1.756) | 0.110          |
|                       | Q5      | 143 (48.0)    | 2.164<br>(1.640, 2.854) | < 0.001        | 1.868<br>(1.433, 2.434) | < 0.001        | 1.861<br>(1.389, 2.495) | < 0.001        | 1.444<br>(1.069, 1.951) | 0.017          |

Note: Model 1, unadjusted model. Model 2, model 1 + adjusted for age, sex, age-adjusted Charlson comorbidity index, primary renal disease, current smoking, medication (ACEi/ARBs, diuretics, number of antihypertensive drugs, statins), BMI, SBP and DBP. Model 3, model 2 + adjusted for hemoglobin, albumin, total cholesterol, LDL-C, HDL-C, TG, fasting glucose, 25(OH) vitamin D, and, hs-CRP. Model 4, model 3 + serum creatinine and spot urine ACR. Abbreviations: CI, confidence interval; HR, hazard ratio; Q1, 1<sup>st</sup> quintile; Q2, 2<sup>nd</sup> quintile, Q3, 3<sup>rd</sup> quintile; Q4, 4<sup>th</sup> quintile; Q5, 5<sup>th</sup> quintile; UAGT/Cr, urinary angiotensinogen-to-creatinine ratio.

**Table S5. HRs for composite renal event by UAGT/Cr level after excluding the subjects with DM.**

|                       | UAGT/Cr | Events, n (%) | Model 1                 |                | Model 2                 |                | Model 3                 |                | Model 4                 |                |
|-----------------------|---------|---------------|-------------------------|----------------|-------------------------|----------------|-------------------------|----------------|-------------------------|----------------|
|                       |         |               | HR<br>(95%CI)           | <i>P</i> value |
| Composite renal event | Q1      | 62 (25.2)     | Reference               |                | Reference               |                | Reference               |                | Reference               |                |
|                       | Q2      | 69 (25.9)     | 1.136<br>(0.785, 1.644) | 0.498          | 1.433<br>(1.009, 2.034) | 0.044          | 1.515<br>(1.033, 2.224) | 0.034          | 1.164<br>(0.773, 1.753) | 0.466          |
|                       | Q3      | 79 (29.5)     | 1.222<br>(0.860, 1.735) | 0.264          | 1.429<br>(1.015, 2.012) | 0.040          | 1.575<br>(1.093, 2.269) | 0.015          | 1.515<br>(1.052, 2.182) | 0.026          |
|                       | Q4      | 81 (30.2)     | 1.364<br>(0.963, 1.931) | 0.080          | 1.221<br>(0.870, 1.716) | 0.249          | 1.464<br>(1.019, 2.104) | 0.039          | 1.240<br>(0.860, 1.786) | 0.249          |
|                       | Q5      | 111 (48.9)    | 2.526<br>(1.814, 3.518) | < 0.001        | 2.117<br>(1.158, 2.913) | < 0.001        | 2.265<br>(1.602, 3.204) | < 0.001        | 1.901<br>(1.335, 2.707) | < 0.001        |

Note: Model 1, unadjusted model. Model 2, model 1 + adjusted for age, sex, age-adjusted Charlson comorbidity index, primary renal disease, current smoking, medication (ACEi/ARBs, diuretics, number of antihypertensive drugs, statins), BMI, SBP and DBP. Model 3, model 2 + adjusted for hemoglobin, albumin, total cholesterol, LDL-C, HDL-C, TG, fasting glucose, 25(OH) vitamin D, and, hs-CRP. Model 4, model 3 + serum creatinine and spot urine ACR. Abbreviations: CI, confidence interval; HR, hazard ratio; Q1, 1<sup>st</sup> quintile; Q2, 2<sup>nd</sup> quintile, Q3, 3<sup>rd</sup> quintile; Q4, 4<sup>th</sup> quintile; Q5, 5<sup>th</sup> quintile; UAGT/Cr, urinary angiotensinogen-to-creatinine ratio.

**Table S6. HRs for composite renal event by UAGT/Cr level after excluding the subjects with PKD.**

|                       | UAGT/Cr | Events, n (%) | Model 1                 |                | Model 2                 |                | Model 3                 |                | Model 4                 |                |
|-----------------------|---------|---------------|-------------------------|----------------|-------------------------|----------------|-------------------------|----------------|-------------------------|----------------|
|                       |         |               | HR<br>(95%CI)           | <i>P</i> value |
| Composite renal event | Q1      | 90 (31.2)     | Reference               |                | Reference               |                | Reference               |                | Reference               |                |
|                       | Q2      | 97 (37.2)     | 1.358<br>(0.996, 1.852) | 0.053          | 1.483<br>(1.084, 2.028) | 0.014          | 1.519<br>(1.106, 2.086) | 0.010          | 1.160<br>(0.829, 1.625) | 0.386          |
|                       | Q3      | 94 (35.7)     | 1.182<br>(0.868, 1.608) | 0.289          | 1.489<br>(1.088, 2.038) | 0.013          | 1.456<br>(1.059, 2.003) | 0.021          | 1.360<br>(0.989, 1.871) | 0.058          |
|                       | Q4      | 108 (38.4)    | 1.424<br>(1.060, 1.913) | 0.019          | 1.623<br>(1.200, 2.196) | 0.002          | 1.576<br>(1.159, 2.141) | 0.004          | 1.257<br>(0.923, 1.713) | 0.147          |
|                       | Q5      | 155 (51.8)    | 2.179<br>(1.650, 2.877) | < 0.001        | 2.125<br>(1.595, 2.831) | < 0.001        | 1.844<br>(1.374, 2.475) | < 0.001        | 1.363<br>(1.009, 1.841) | 0.044          |

Note: Model 1, unadjusted model. Model 2, model 1 + adjusted for age, sex, age-adjusted Charlson comorbidity index, primary renal disease, current smoking, medication (ACEi/ARBs, diuretics, number of antihypertensive drugs, statins), BMI, SBP and DBP. Model 3, model 2 + adjusted for hemoglobin, albumin, total cholesterol, LDL-C, HDL-C, TG, fasting glucose, 25(OH) vitamin D, and, hs-CRP. Model 4, model 3 + serum creatinine and spot urine ACR. Abbreviations: CI, confidence interval; HR, hazard ratio; Q1, 1<sup>st</sup> quintile; Q2, 2<sup>nd</sup> quintile, Q3, 3<sup>rd</sup> quintile; Q4, 4<sup>th</sup> quintile; Q5, 5<sup>th</sup> quintile; UAGT/Cr, urinary angiotensinogen-to-creatinine ratio.

**Table S7. HRs for composite renal event by UAGT/Cr level in the quartile division.**

|                       | UAGT/Cr                 | Events, n (%) | Model 1                 |                | Model 2                 |                | Model 3                 |                | Model 4                 |                |
|-----------------------|-------------------------|---------------|-------------------------|----------------|-------------------------|----------------|-------------------------|----------------|-------------------------|----------------|
|                       |                         |               | HR<br>(95%CI)           | <i>P</i> value |
| Composite renal event | 1 <sup>st</sup> quarter | 132 (31.3)    | Reference               |                | Reference               |                | Reference               |                | Reference               |                |
|                       | 2 <sup>nd</sup> quarter | 152 (36.0)    | 1.187<br>(0.924, 1.524) | 0.179          | 1.381<br>(1.089, 1.751) | 0.008          | 1.325<br>(1.026, 1.711) | 0.031          | 1.111<br>(0.851, 1.449) | 0.440          |
|                       | 3 <sup>rd</sup> quarter | 136 (32.2)    | 1.072<br>(0.834, 1.377) | 0.589          | 1.247<br>(0.976, 1.594) | 0.078          | 1.337<br>(1.030, 1.734) | 0.029          | 1.148<br>(0.883, 1.491) | 0.303          |
|                       | 4 <sup>th</sup> quarter | 212 (50.2)    | 2.050<br>(1.629, 2.580) | < 0.001        | 1.781<br>(1.424, 2.228) | < 0.001        | 1.758<br>(1.378, 2.244) | < 0.001        | 1.385<br>(1.078, 1.778) | 0.011          |

Note: Model 1, unadjusted model. Model 2, model 1 + adjusted for age, sex, age-adjusted Charlson comorbidity index, primary renal disease, current smoking, medication (ACEi/ARBs, diuretics, number of antihypertensive drugs, statins), BMI, SBP and DBP. Model 3, model 2 + adjusted for hemoglobin, albumin, total cholesterol, LDL-C, HDL-C, TG, fasting glucose, 25(OH) vitamin D, and, hs-CRP. Model 4, model 3 + serum creatinine and spot urine ACR. Abbreviations: CI, confidence interval; HR, hazard ratio; UAGT/Cr, urinary angiotensinogen-to-creatinine ratio.

**Table S8. HRs for composite renal event by UAGT/Cr level, where the co-variate ‘serum creatinine level’ was replaced with ‘eGFR’.**

|                       | UAGT/Cr | Adjusted                |                |
|-----------------------|---------|-------------------------|----------------|
|                       |         | HR<br>(95%CIs)          | <i>P</i> value |
| Composite renal event | Q1      | Reference               |                |
|                       | Q2      | 1.278<br>(0.948, 1.724) | 0.108          |
|                       | Q3      | 1.286<br>(0.958, 1.726) | 0.095          |
|                       | Q4      | 1.197<br>(0.892, 1.604) | 0.230          |
|                       | Q5      | 1.427<br>(1.078, 1.888) | 0.013          |

Note: Adjusted for age, sex, age-adjusted Charlson comorbidity index, primary renal disease, current smoking, medication (ACEi/ARBs, diuretics, number of antihypertensive drugs, statins), BMI, SBP, DBP, hemoglobin, albumin, total cholesterol, LDL-C, HDL-C, TG, fasting glucose, 25(OH) vitamin D, hs-CRP, eGFR and spot urine ACR. Abbreviations: CI, confidence interval; HR, hazard ratio; Q1, 1st quintile; Q2, 2nd quintile, Q3, 3rd quintile; Q4, 4th quintile; Q5, 5th quintile; UAGT/Cr, urinary angiotensinogen-to-creatinine ratio.
